# Supplementary material
Source: PubMed Central journal article supplement (PMC5927999)
Supplement: 2017_183160-Disclosures_and_Contributions.pdf [file 2017_183160-Disclosures_and_Contributions.pdf]

Haematologica  
HAEMATOL/2017/183160  
Version 3

The mutational landscape of 18 investigated genes clearly separates  
four subtypes of myelodysplastic/myeloproliferative neoplasms

Manja Meggendorfer, Sabine Jeromin, Claudia Haferlach, Wolfgang  
Kern, and Torsten Haferlach

Disclosures: WK, CH, and TH declare part ownership of the MLL Munich Leukemia  
Laboratory. MM and SJ are employed by the MLL Munich Leukemia Laboratory.

Contributions: MM investigated molecular mutations, analyzed the data and wrote the  
manuscript. SJ contributed to data analyses. CH was responsible for cytogenetics. WK was  
involved in data analyses. TH was responsible for cytomorphologic analysis, was the  
principle investigator of the study. All authors read and contributed to the final version of  
the manuscript.
